# Supplementary material for: Effects of the novel pesticide flupyradifurone (Sivanto) on honeybee taste and cognition
Source: PubMed Central journal article supplement (PMC5862975; doi:10.1038/s41598-018-23200-0), 2018-03-21
Supplement: 41598_2018_23200_MOESM1_ESM.pdf [file 41598_2018_23200_MOESM1_ESM.pdf]

## **Supplementary information**

# **Effects of the novel pesticide flupyradifurone (Sivanto) on honeybee taste and cognition**

Hannah Hesselbach<sup>1</sup>, Ricarda Scheiner<sup>1\*</sup>

<sup>1</sup> University of Würzburg, Biocenter, Behavioral Physiology and Sociobiology,  
Am Hubland, 97074 Würzburg, Germany

|                                                                           | Test            | Value | df | P-value |
|---------------------------------------------------------------------------|-----------------|-------|----|---------|
| <b>Mortality 120 min after 1,7 *10<sup>-4</sup> mol/l flupyradifurone</b> | Chi Square Test | 7.5   | 1  | 0.006   |

**Supplementary table T 1:** Test results of preliminary mortality study.

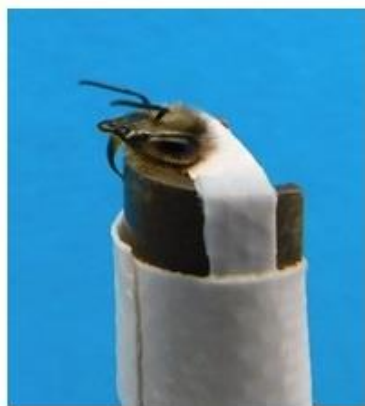

**Harnessed honeybees, fed once with varying doses of flupyradifurone (8.3 \*10<sup>-4</sup> mol/l, 8.3 \*10<sup>-5</sup> mol/l, 8.3 \*10<sup>-6</sup> mol/l, control)**

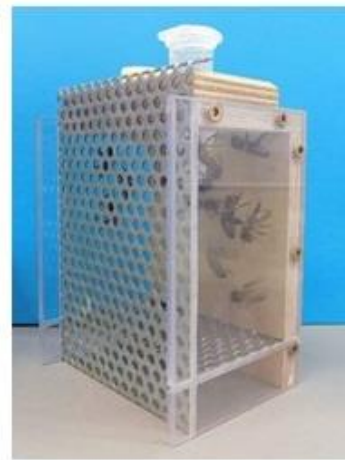

**Cages in the incubator for 72 h (temperature 28 °C, relative humidity 60%, sugar 50% ad libitum)**

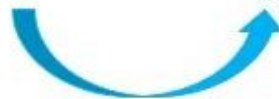

**Honeybees released in cages (internal dimensions 8 cm x 5 cm x 5 cm)**

**Supplementary Figure S 1:** Schematic figure, showing the practical performance of the mortality experiment.

|                     | Test            | Value | df | P-value |
|---------------------|-----------------|-------|----|---------|
| <b>First trial</b>  | Chi Square Test | 4.0   | 3  | 0.265   |
| <b>Second trial</b> |                 | 2.2   | 3  | 0.528   |

**Supplementary table T 2:** Test results of the mortality study.

|                              | Treatment                    | Test                              | Value | df   | P-value |
|------------------------------|------------------------------|-----------------------------------|-------|------|---------|
| <b>Taste behavior</b>        |                              | Logistic Regression               | 51.3  | 3    | .000    |
|                              | 8.3 * 10 <sup>-6</sup> mol/l | Least Significant Difference Test |       | 1    | .808    |
|                              | 8.3 * 10 <sup>-5</sup> mol/l |                                   | 1     | .731 |         |
|                              | 8.3 * 10 <sup>-4</sup> mol/l |                                   | 1     | .000 |         |
| <b>Taste behavior</b>        |                              | Kruskal-Wallis H Test             | 43.0  | 3    | .000    |
|                              | 8.3 * 10 <sup>-6</sup> mol/l | Dunn's Post-Hoc-Test              |       | 1    | .798    |
|                              | 8.3 * 10 <sup>-5</sup> mol/l |                                   | 1     | .757 |         |
|                              | 8.3 * 10 <sup>-4</sup> mol/l |                                   | 1     | .000 |         |
| <b>GRS<sup>1</sup></b>       |                              | Kruskal-Wallis H Test             | .6    | 3    | .902    |
| <b>Spontaneous reactions</b> |                              | Chi Square Test                   | 3.0   | 3    | .388    |
| <b>Conditioning</b>          |                              | Logistic Regression               | 26.6  | 3    | .000    |
|                              | 8.3 * 10 <sup>-6</sup> mol/l | Least Significant Difference Test |       | 1    | .166    |
|                              | 8.3 * 10 <sup>-5</sup> mol/l |                                   | 1     | .954 |         |
|                              | 8.3 * 10 <sup>-4</sup> mol/l |                                   | 1     | .000 |         |
| <b>Conditioning</b>          |                              | Kruskal-Wallis H Test             | 18.1  | 3    | .000    |
|                              | 8.3 * 10 <sup>-6</sup> mol/l | Dunn's Post-Hoc-Test              |       | 1    | .203    |
|                              | 8.3 * 10 <sup>-5</sup> mol/l |                                   | 1     | .945 |         |
|                              | 8.3 * 10 <sup>-4</sup> mol/l |                                   | 1     | .001 |         |
| <b>Extinction</b>            |                              | Kruskal-Wallis H Test             | 14.6  | 3    | .002    |
|                              | 8.3 * 10 <sup>-6</sup> mol/l | Dunn's Post-Hoc-Test              |       | 1    | .382    |
|                              | 8.3 * 10 <sup>-5</sup> mol/l |                                   | 1     | .975 |         |
|                              | 8.3 * 10 <sup>-4</sup> mol/l |                                   | 1     | .003 |         |
| <b>Discrimination</b>        |                              | Kruskal-Wallis H Test             | .7    | 3    | .869    |

**Supplementary table T 3:** Test results of pollen foraging bees. Post hoc comparisons show treatment against control. For number of bees per treatment see table 1. GRS<sup>1</sup>: GRS of conditioned bees.

|                              | Treatment                    | Test                              | Value | df   | P-value |
|------------------------------|------------------------------|-----------------------------------|-------|------|---------|
| <b>Taste behavior</b>        |                              | Logistic Regression               | 72.0  | 3    | .000    |
|                              | 8.3 * 10 <sup>-6</sup> mol/l | Least Significant Difference Test |       | 1    | .200    |
|                              | 8.3 * 10 <sup>-5</sup> mol/l |                                   | 1     | .696 |         |
|                              | 8.3 * 10 <sup>-4</sup> mol/l |                                   | 1     | .000 |         |
| <b>Taste behavior</b>        |                              | Kruskal-Wallis H Test             | 52.6  | 3    | .000    |
|                              | 8.3 * 10 <sup>-6</sup> mol/l | Dunn's Post-Hoc-Test              |       | 1    | .242    |
|                              | 8.3 * 10 <sup>-5</sup> mol/l |                                   | 1     | .700 |         |
|                              | 8.3 * 10 <sup>-4</sup> mol/l |                                   | 1     | .000 |         |
| <b>GRS<sup>1</sup></b>       |                              | Kruskal-Wallis H Test             | 14.9  | 3    | .002    |
|                              | 8.3 * 10 <sup>-6</sup> mol/l | Dunn's Post-Hoc-Tests             |       | 1    | .819    |
|                              | 8.3 * 10 <sup>-5</sup> mol/l |                                   | 1     | .299 |         |
|                              | 8.3 * 10 <sup>-4</sup> mol/l |                                   | 1     | .001 |         |
| <b>Spontaneous reactions</b> |                              | Chi Square Test                   | 11.1  | 3    | .011    |
| <b>Conditioning</b>          |                              | Logistic Regression               | 25.2  | 3    | .000    |
|                              | 8.3 * 10 <sup>-6</sup> mol/l | Least Significant Difference Test |       | 1    | .491    |
|                              | 8.3 * 10 <sup>-5</sup> mol/l |                                   | 1     | .180 |         |
|                              | 8.3 * 10 <sup>-4</sup> mol/l |                                   | 1     | .000 |         |
| <b>Conditioning</b>          |                              | Kruskal-Wallis H Test             | 18.5  | 3    | .000    |
|                              | 8.3 * 10 <sup>-6</sup> mol/l | Dunn's Post-Hoc-Test              |       | 1    | .627    |
|                              | 8.3 * 10 <sup>-5</sup> mol/l |                                   | 1     | .234 |         |
|                              | 8.3 * 10 <sup>-4</sup> mol/l |                                   | 1     | .000 |         |
| <b>Extinction</b>            |                              | Kruskal-Wallis H Test             | 8.9   | 3    | .031    |
|                              | 8.3 * 10 <sup>-6</sup> mol/l | Dunn's Post-Hoc-Test              |       | 1    | .299    |
|                              | 8.3 * 10 <sup>-5</sup> mol/l |                                   | 1     | .316 |         |
|                              | 8.3 * 10 <sup>-4</sup> mol/l |                                   | 1     | .116 |         |
| <b>Discrimination</b>        |                              | Kruskal-Wallis H Test             | .8    | 3    | .860    |

**Supplementary table T 4:** Test results of nectar foraging bees. Post hoc comparisons show treatment against control. For number of bees per treatment see table 1. GRS<sup>1</sup>: GRS of conditioned bees.
